1 **Sex chromosomes control vertical transmission of feminizing**

2 ***Wolbachia* symbionts in an isopod**

3

4 Thomas Becking<sup>1</sup>, Mohamed Amine Chebbi<sup>1</sup>, Isabelle Giraud<sup>1</sup>, Bouziane Moumen<sup>1</sup>, Tiffany Laverré<sup>1</sup>,  
5 Yves Caubet<sup>1</sup>, Jean Peccoud<sup>1</sup>, Clément Gilbert<sup>1,2,3</sup> and Richard Cordaux<sup>1,3,\*</sup>

6

7 <sup>1</sup>Laboratoire Ecologie et Biologie des Interactions, Equipe Ecologie Evolution Symbiose, Unité Mixte  
8 de Recherche 7267 Centre National de la Recherche Scientifique, Université de Poitiers, TSA 51106,  
9 86073 Poitiers Cedex 9, France.

10 <sup>2</sup>Present address: Laboratoire Evolution, Génomes, Comportement, Écologie, Unité Mixte de  
11 Recherche 9191 Centre National de la Recherche Scientifique and Unité Mixte de Recherche 247  
12 Institut de Recherche pour le Développement, Université Paris-Sud, 91198 Gif-sur-Yvette, France.

13 <sup>3</sup>CG and RC are equal senior authors.

14

15 \* Corresponding author: Dr. Richard Cordaux

16 Phone: +33-5-49-45-36-51

17 Email: [richard.cordaux@univ-poitiers.fr](mailto:richard.cordaux@univ-poitiers.fr)

18 **Abstract**

19

20 Microbial endosymbiosis is widespread in animals, with major ecological and evolutionary  
21 implications. Successful symbiosis relies on efficient vertical transmission through host generations.  
22 However, when symbionts negatively affect host fitness, hosts are expected to evolve suppression of  
23 symbiont effects or transmission. Here we show that sex chromosomes control vertical transmission  
24 of feminizing *Wolbachia* endosymbionts in the isopod *Armadillidium nasatum*. Theory predicts that  
25 the invasion of an XY/XX species by cytoplasmic sex ratio distorters is unlikely because it leads to  
26 fixation of the unusual (and often lethal or infertile) YY genotype. We demonstrate that *A. nasatum* X  
27 and Y sex chromosomes are genetically highly similar and YY individuals are viable and fertile,  
28 thereby enabling *Wolbachia* spread in this XY-XX species. Nevertheless, we show that *Wolbachia*  
29 cannot drive fixation of YY individuals because infected YY females do not transmit *Wolbachia* to  
30 their offspring, unlike XX and XY females. The genetic basis fits the model of a Y-linked recessive  
31 allele (associated with an X-linked dominant allele), in which the homozygous state suppresses  
32 *Wolbachia* transmission. Moreover, production of all-male progenies by infected YY females restores  
33 a balanced sex ratio at the host population level. This suggests that blocking of *Wolbachia*  
34 transmission by YY females may have evolved to suppress feminization, thereby offering a whole  
35 new perspective on the evolutionary interplay between microbial symbionts and host sex  
36 chromosomes.

37

38 **Keywords**

39

40 Male heterogamety, sex chromosomes, endosymbiont, sex ratio distorter, *Wolbachia*, genetic  
41 conflicts, feminization, genome sequencing

## 42 Introduction

43

44 Microbial endosymbiosis is widespread in animals, with major effects on host ecology and  
45 evolution [1,2]. Successful symbiosis relies on efficient symbiont transmission through host  
46 generations. Vertical transmission occurs when symbionts are transferred from parent to offspring,  
47 usually through the maternal germ line [3,4]. From a symbiont perspective, faithful maternal  
48 inheritance can be achieved by conferring benefits to hosts, such as nutritional provisioning [5],  
49 defense against natural enemies [6] and pathogen resistance [7,8]. This transmission strategy leads  
50 to convergence of symbiont and host fitness. Conversely, symbionts may follow a selfish strategy  
51 consisting of favouring their transmission at the expense of host fitness. This is achieved through  
52 manipulation of host reproduction, which can result in highly distorted sex ratios [9,10]. As balanced  
53 sex ratios are optimal for most nuclear genes owing to biparental inheritance, hosts are predicted to  
54 evolve suppression mechanisms to control symbiont effects or transmission [10,11]. Genetic conflicts  
55 between sex ratio distorters, such as feminizing symbionts, and the rest of the genome are  
56 increasingly recognized as drivers of the evolution of host sex determination systems [10–16]. Here  
57 we take the reverse perspective and investigate whether host sex chromosome systems can  
58 influence symbiont transmission and dynamics.

59 In many animals, sex is determined by a locus located on sex chromosomes that is  
60 heterozygous in one sex (the heterogametic sex) and homozygous in the other sex (the homogametic  
61 sex). Two major types of sex chromosomes exist: male heterogamety (XY males and XX females) and  
62 female heterogamety (ZZ males and ZW females) [13,15]. Sex chromosomes evolve from autosomes  
63 that acquired a sex-determining locus characterized by sex-specific inheritance. Subsequently,  
64 genomic regions around sex-determining loci often stop recombining, leading to gradual  
65 accumulation of nucleotide and structural variation and repetitive DNA [13,15,17–19]. This so-called  
66 degeneration process also causes the formation of pseudogenes and gene loss, resulting in increasing  
67 differentiation of sex chromosomes over time. This is well illustrated by the human X and Y sex  
68 chromosomes, which dramatically differ in size and gene content [19].

69 Terrestrial isopods (crustaceans) are an ideal model to examine sex chromosome influence  
70 on symbiont transmission. This is because both female and male heterogametic systems of sex  
71 chromosomes are found in this group [20] and many species are naturally infected with *Wolbachia*  
72 bacteria [21,22]. *Wolbachia* are intracellular, maternally inherited endosymbionts of arthropods,  
73 often acting as reproductive parasites that manipulate host reproduction to favour infected females  
74 in host populations [23]. In terrestrial isopods, *Wolbachia* is best known as a sex ratio distorter due

75 to its ability to feminize genetic males into phenotypic females [10,24–26]. For example, the  
76 presence of feminizing *Wolbachia* in *Armadillidium vulgare* leads to highly female-biased progenies  
77 [27,28] because symbionts override the ZZ/ZW system of sex chromosomes [29,30]. As a result,  
78 genetic ZZ male embryos develop as phenotypic ZZ females when infected by *Wolbachia*. Theoretical  
79 models predict the extinction of the W sex chromosome in *A. vulgare* lines infected by *Wolbachia*  
80 [31,32] and empirical evidence verified this prediction [33,34]. Thus, all individuals of *Wolbachia*-  
81 infected lineages end up with ZZ sex chromosomes at equilibrium, those inheriting *Wolbachia*  
82 develop as females and those lacking *Wolbachia* develop as males. This phenomenon is known as  
83 cytoplasmic sex determination [10,24–26]. In sum, invasion of a ZZ/ZW species by feminizing  
84 *Wolbachia* is not problematic because it leads to the fixation of the ZZ genotype, which is the natural  
85 male genotype.

86 In sharp contrast with ZZ/ZW heterogamety, the conditions allowing feminizing *Wolbachia* to  
87 spread in an XY/XX heterogametic system are much more stringent. Indeed, theoretical work predicts  
88 that infection of an XY/XX system by a cytoplasmic sex ratio distorter should drive the loss of the X  
89 chromosome and concomitantly lead to fixation of the YY genotype at equilibrium [31]. In this case,  
90 YY individuals inheriting *Wolbachia* should develop as females and those lacking *Wolbachia* should  
91 develop as males. However, YY is not a standard genotype and it may often be lethal or infertile,  
92 owing to Y chromosome degeneration causing the loss of essential genes [13,15,17–19]. Therefore,  
93 XY/XX heterogamety should prevent the invasion of feminizing *Wolbachia* symbionts, unless the X  
94 and Y chromosomes are not substantially divergent, i.e. they both carry all vital loci and are  
95 genetically very similar. To the best of our knowledge, this prediction has never been explored  
96 empirically.

97 Here, we investigated the interplay between sex chromosomes and *Wolbachia* symbionts in  
98 *Armadillidium nasatum*, a terrestrial isopod species related to *A. vulgare* [20]. Analogous to *A.*  
99 *vulgare*, a feminizing *Wolbachia* strain (wNas) is naturally present in *A. nasatum* [21,35,36]. However,  
100 unlike *A. vulgare*, chromosomal sex determination follows XY/XX heterogamety in *A. nasatum*  
101 [20,35]. This result was established using an original strategy consisting of experimentally reversing  
102 young genetic females into phenotypic males, crossing them with their sisters and analyzing sex  
103 ratios of the resulting progenies [20,35]. Here, based on whole-genome sequencing, pedigree  
104 analyses and simulations, we show that *Wolbachia* endosymbionts can spread in *A. nasatum*  
105 populations because *A. nasatum* sex chromosomes are genetically highly similar and YY males and  
106 females are both viable and fertile. Nevertheless, *Wolbachia* cannot drive the loss of the X  
107 chromosome because infected YY females do not transmit *Wolbachia* to their offspring, unlike XX  
108 and XY females. As infected YY females produce all-male progenies, a balanced sex ratio is

109 maintained at the host population level despite the presence of feminizing *Wolbachia*, suggesting  
110 that blocking of *Wolbachia* transmission by YY females may have evolved to suppress feminization.

111

## 112 **Results**

113

### 114 *De novo assembly and annotation of male (XY) A. nasatum genome*

115 We sequenced the male (XY) genome of an *A. nasatum* line derived from wild animals  
116 sampled in Thuré (France) in 2008. Males and females from this line have been consistently  
117 producing progenies with balanced sex ratios in our laboratory. In addition, sex reversal and crossing  
118 experiments demonstrated that sex determination in this line follows male heterogamety [20].  
119 Absence of *Wolbachia* endosymbionts in the individuals selected for sequencing was confirmed by  
120 PCR.

121 We assembled the *A. nasatum* genome using a hybrid approach combining short paired-end  
122 Illumina reads and long PacBio reads (S1 Table). The initial assembly was processed through  
123 polishing, decontamination and scaffolding by a transcriptome assembly. The final assembly had a  
124 total length of 1,223,175,971 bp. It was composed of 25,196 contigs and scaffolds (hereafter  
125 collectively referred to as “contigs”) with an N<sub>50</sub> of 86,284 bp, and containing barely no (0.01%)  
126 undetermined nucleotides (Table 1). Genome completeness assessment using Benchmarking  
127 Universal Single Copy Orthologs (BUSCO 3.0.1) [37] revealed that 1,001 of 1,066 (94%) conserved  
128 specific arthropod genes were present in the assembly (Table 1). Furthermore, transcriptome  
129 assembly alignment on the genome assembly yielded 99.0% of transcripts longer than 1 kb aligned.  
130 Thus, we have obtained a reliable assembly of the XY male genome from *A. nasatum*.

131 **Table 1.** Summary information of *Armadillidium nasatum* genome assembly.

| Genome assembly features              | Assembly figures |
|---------------------------------------|------------------|
| Assembly statistics                   |                  |
| Number of contigs and scaffolds       | 25,196           |
| Total size                            | 1,223,175,971 bp |
| Longest contig/scaffold               | 877,941 bp       |
| Number of contigs and scaffolds >1 kb | 25,166           |
| N <sub>50</sub> contig size           | 75,116 bp        |
| N <sub>50</sub> scaffold size         | 86,284 bp        |
| Undetermined nucleotides              | 0.01%            |
| G+C content                           | 25.77%           |
| Analysis of BUSCO genes               |                  |
| Complete genes                        | 974/1066 (91.4%) |
| Complete and single-copy genes        | 932/1066 (87.4%) |
| Complete and duplicated genes         | 42/1066 (3.9%)   |
| Fragmented genes                      | 27/1066 (2.5%)   |
| Missing genes                         | 65/1066 (6.1%)   |

132

133

134 The annotation of the *A. nasatum* assembly included 14,636 predicted gene models with an  
135 average length of 9,422 bp and representing 11.3% of the total assembly length (S2 Table). Among  
136 these predicted genes, 9,281 (63.4%) had Blastp hits to the UniProt-SwissProt database (release  
137 September 2016) and 9,459 (64.6%) had InterProScan hits to Pfam domains (version 30.0) and 6,137  
138 (41.9%) had Gene Ontology terms. Repeats accounted for 64.6% (or 790 Mb) of the *A. nasatum*  
139 assembly (S3 Table). Specifically, transposable elements and simple tandem repeats accounted for  
140 40.6% (or 496 Mb) and 23.1% (or 283 Mb) of the genome. The annotated genome sequence of *A.*  
141 *nasatum* is available in DDBJ/ENA/GenBank under accession number SEYY00000000. The version  
142 described in this article is version SEYY01000000.

143

#### 144 *High genetic similarity of the X and Y chromosomes*

145 To investigate the extent of genomic differentiation between sex chromosomes, we searched  
146 the *A. nasatum* assembly for contigs containing Y-specific sequences. We mapped short paired-end  
147 Illumina reads generated for XY males and XX females (S1 Table) onto the *A. nasatum* assembly and  
148 performed a Chromosome Quotient analysis [38]. This analysis consists of comparing the ratios of

149 female-to-male sequencing depths (CQ) for each contig, with the expectations that: (i) Y-specific  
150 contigs should be mapped by male reads only (CQ  $\sim 0$ ), (ii) X-specific contigs should be mapped by  
151 female reads at twice the sequencing depth of male reads (CQ  $\sim 2$ ), and (iii) autosomal contigs should  
152 be mapped at similar sequencing depths by female and male reads (CQ  $\sim 1$ ). The resulting frequency  
153 distribution of CQ scores was unimodal and centered at CQ  $\sim 1$  (mean: 1.03, median: 1.04), with no  
154 peak at CQ scores of  $\sim 0$  and  $\sim 2$  (Fig 1a). In addition, we used the mapping-free Y chromosome  
155 Genome Scan (YGS) method [39], which computes the proportion of single copy k-mers for each  
156 contig of the genome assembly of the heterogametic (male) sex that are unmatched to sequencing  
157 reads of the homogametic (female) sex. Y-specific contigs are expected to be unmatched by female  
158 reads (YGS  $\sim 100\%$ ) while autosomal and X-linked contigs are expected to be matched entirely (YGS  
159  $\sim 0\%$ ). The resulting frequency distribution of YGS scores indicated that most contigs have very low  
160 YGS scores (mean: 14.5%, median: 11.2%) and very few contigs had high YGS scores (i.e. only 43  
161 contigs with YGS $\geq 80\%$  and just 2 with YGS $\geq 90\%$ ) (Fig 1b). Thus, the CQ and YGS analyses consistently  
162 indicated that the *A. nasatum* assembly mostly contains autosomal contigs and very few contigs  
163 containing X- and Y-specific sequences. Intersecting the results of the CQ and YGS analyses identified  
164 only 78 out of the 25,196 contigs of the assembly as containing Y-specific sequences, despite the use  
165 of permissive thresholds, i.e. CQ $\leq 0.35$  and YGS $\geq 35\%$  (Fig 1c). The 78 contigs comprised a total length  
166 of 1,327 kb, corresponding to just 0.1% of the *A. nasatum* genome assembly (S4 Table). While most  
167 contigs lacked any gene (65/78, or 83%), a total of 20 genes (out of 14,636 genes in the assembly)  
168 were annotated from 13 contigs (S4 Table). They constitute candidate master genes for sex  
169 determination in *A. nasatum*. Thus, the Y-specific region of the *A. nasatum* genome is extremely  
170 small (around one megabase) and contains very few genes, leading to the conclusion that the X and Y  
171 chromosomes are poorly differentiated at the genomic and genic levels.

172

173 [Insert Fig 1 here]

174 **Fig 1.** Identification of sex-specific contigs in the *Armadillidium nasatum* genome assembly.  
175 Frequency distribution of CQ (a) and YGS (b) scores calculated for each contig and scaffold of the  
176 assembly. (c) Comparison of CQ and YGS scores. Each dot corresponds to one contig or scaffold  
177 (those with CQ $>2$  are not represented). The red box contains 78 contigs with CQ $\leq 0.35$  and YGS $\geq 35\%$ .

178

179 To investigate sex chromosome differentiation at the molecular level, we analyzed the  
180 patterns of sequence divergence and repeat content in the 78 contigs containing Y-specific

181 sequences relative to the other contigs of the *A. nasatum* genome. First, we analyzed the density of  
182 single nucleotide polymorphisms (SNP) in the 78 contigs (after removal of hemizygous regions, to  
183 focus on regions with orthologs on the X chromosome) versus the other contigs of the assembly. We  
184 calculated an average SNP density of 5.54 SNP/kb between allelic X/Y regions of the 78 contigs,  
185 compared to 3.40 SNP/kb across all other contigs of the assembly. Thus, we observed a slight (1.6-  
186 fold) but non-significant (Mann-Whitney bilateral U test, U=976,370, p-value=0.45) excess of SNP  
187 density in allelic X/Y regions relative to other regions of the genome. Furthermore, the repeat  
188 content in the 78 contigs was slightly higher than (66.1% on average, S4 Table), but not significantly  
189 different (Mann-Whitney bilateral U test, U= 1,048,600 p-value=0.28) from the repeat content of all  
190 other contigs (64.6%). In sum, our results indicated that *A. nasatum* sex chromosomes present  
191 patterns of molecular evolution that are quite similar to those of other genomic regions, with a slight  
192 elevation of SNP density and repeat content in contigs containing Y-specific sequences that is  
193 consistent with expectations for sex-specific sequences of the genome [40]. We conclude that the X  
194 and Y chromosomes of *A. nasatum* are highly similar not only at the genomic and genic levels, but  
195 also at the molecular level.

196

#### 197 *YY individuals are viable and fertile*

198 To test for the existence and, if so, viability and fertility of YY individuals, we tracked Y  
199 chromosome inheritance in a *Wolbachia*-infected *A. nasatum* pedigree. First, we established robust  
200 Y-specific molecular markers using the Y-specific contigs identified previously. Reliable PCR assays  
201 were successfully designed for 42 of the 78 contigs containing Y-specific sequences, most of which  
202 (25/42) exhibited male-specific amplification with DNA samples from males and females closely  
203 related to those used for genome sequencing (S4 Table). However, only 9 of the 25 confirmed  
204 markers displayed male-specific amplification when tested in more distantly related individuals from  
205 the same population and in individuals from two other populations. Lack of sex specificity of a subset  
206 of markers in some populations indicated that recombination has occurred between some of the  
207 tested contigs and the sex-determining locus. This result provided further evidence that the Y-  
208 specific region of the genome is extremely small in *A. nasatum*. Concomitantly, the universal male  
209 specificity of 9 markers across all tested populations demonstrated that these *A. nasatum*  
210 populations possess a homologous Y chromosome. Hence, we used a subset of these robust markers  
211 to track the Y chromosome in an *A. nasatum* pedigree spanning three generations.

212 The pedigree was initiated by crossing a male with a female naturally infected by the  
213 feminizing *Wolbachia* strain *wNas*, which produced an F1 progeny comprising 17 sisters (Fig 2). Two



214 F1 sisters were then crossed with genetic males (XY), to produce two F2 progenies: I-F2-1 comprising  
215 24 females and I-F2-2 comprising 32 males. *Wolbachia* infection was tested in the 62 individuals of  
216 the pedigree (except the F0 father), indicating that all females carried *Wolbachia* while all males  
217 lacked *Wolbachia* infection, as expected. Next, we used previously designed Y-specific markers to  
218 assess the presence of the Y chromosome in the 62 individuals (except the F0 father). In the I-F2-1  
219 progeny, half of the females showed amplification of the Y markers (indicating they are XY or YY) and  
220 half did not (indicating they are XX). The F2-1 mother carried XX chromosomes, as she did not  
221 amplify the Y markers. As all I-F2-1 offspring necessarily carry one X chromosome from their mother,  
222 the 11 I-F2-1 females amplifying the Y markers must be XY. In the I-F2-2 progeny, all individuals  
223 amplified the Y markers (indicating they are XY or YY), as did their mother. Given that the F2-2 father  
224 is XY, if the F2-2 mother was XY, we would have expected 25% XX individuals in the I-F2-2 progeny,  
225 but there was none. Thus, the I-F2-2 mother must be YY, which is the only genotype that can explain  
226 that the entire I-F2-2 progeny carries at least one Y chromosome. Given the parental genotypes, we  
227 predicted the I-F2-2 progeny is composed of half XY males and half YY males. Finally, the two F1  
228 sisters being XX and YY, it followed that the F0 father and mother are XY. To independently assess  
229 these predictions, we devised a quantitative PCR assay measuring Y chromosome dose relative to  
230 autosomes (S1 Fig). This assay confirmed the predicted genotypes of the F0 and F1 individuals we  
231 tested and the composition of the I-F2-2 progeny (15 XY and 17 YY individuals) (Fig 2, S5 Table). In  
232 sum, the resolution of sex chromosome genotypes in the pedigree demonstrated that the YY  
233 genotype is viable both as male and as female in *A. nasatum*, as is the XY genotype. Moreover, the YY  
234 and XY genotypes are both fertile as females. Finally, we show below that the YY genotype is also  
235 fertile as male.

236

237 [Insert Fig 2 here]

238 **Fig 2.** *Armadillidium nasatum* pedigree used to track inheritance of the Y chromosome and  
239 *Wolbachia*. The pedigree spans three generations (F0-F2) and is comprised of 62 individuals (35  
240 males and 27 females) for which sex chromosome genotype (XX, XY or YY) was identified and 15 F1  
241 females not included in the molecular analyses (dotted circle). Males are shown as squares and  
242 females as circles. Individuals carrying *Wolbachia* are shown in purple. Progeny IDs are shown in  
243 grey. Sex chromosome genotype of individuals marked with an orange star (34 males and 2 females)  
244 was also assessed with a quantitative PCR assay.

245

246 *Blocking of Wolbachia transmission by YY females prevents X chromosome loss*

247 Surprisingly, the *Wolbachia*-infected YY mother in the previous pedigree analysis produced  
248 an all-male progeny (I-F2-2) entirely lacking *Wolbachia* endosymbionts (Fig 2). This is unexpected  
249 because infection by feminizing *Wolbachia* endosymbionts is usually associated with highly female-  
250 biased progenies, due to the maternal transmission of *Wolbachia* to usually >80% of the offspring  
251 [10,24–26]. To test whether lack of *Wolbachia* transmission from mother to I-F2-2 progeny was a  
252 random event or was due to the unusual YY maternal genotype, we extended our previous pedigree  
253 analysis to span five generations (S2 Fig) and analysed a second, independent pedigree spanning four  
254 generations (S3 Fig). In total, 20 families (defined as father, mother and progeny) were included in  
255 the two pedigrees, representing 799 individuals (252 males and 547 females). We tested 464  
256 individuals for the presence of *Wolbachia* (Table 2). As expected, most tested females were infected  
257 by *Wolbachia* (180/214) while no tested male was (0/250). Based on the patterns of Y chromosome  
258 amplification and following a reasoning similar to that described in the previous section, we were  
259 able to infer sex chromosome genotypes for most analysed individuals. In addition, we  
260 independently verified sex chromosome genotypes of the parents of the 20 families using the  
261 aforementioned quantitative PCR assay (S5 Table). The sex chromosome genotypes of the 20  
262 mothers included 11 XX, 5 XY and 4 YY females (S2 and S3 Fig, Table 2). All tested fathers were XY  
263 males, except the father of the II-F2-1 progeny which was a YY male. Interestingly, this individual  
264 demonstrated that the YY genotype is viable and fertile as male.

265  
266  
267

**Table 2.** Composition and frequency of *Wolbachia* infection in 20 families of *Armadillidium nasatum*. *Wolbachia* frequency in progenies was calculated as the *Wolbachia* frequency observed among tested females weighted by female proportion in the progenies (as all males lack *Wolbachia*).

| Progeny ID | Parental genotypes |        | Progeny size | Female number | Female proportion | <i>Wolbachia</i> presence in males |              | <i>Wolbachia</i> presence in females |              | <i>Wolbachia</i> frequency |
|------------|--------------------|--------|--------------|---------------|-------------------|------------------------------------|--------------|--------------------------------------|--------------|----------------------------|
|            | Mother             | Father |              |               |                   | Nb. tested                         | Nb. infected | Nb. tested                           | Nb. infected |                            |
| I-F1-1     | XY                 | XY     | 17           | 17            | 100%              | 0                                  | 0            | 3                                    | 3            | 100%                       |
| I-F2-1     | XX                 | XY     | 24           | 24            | 100%              | 0                                  | 0            | 24                                   | 24           | 100%                       |
| I-F2-2     | YY                 | XY     | 32           | 0             | 0%                | 32                                 | 0            | 0                                    | 0            | 0%                         |
| I-F2-3     | XX                 | XY     | 52           | 52            | 100%              | 0                                  | 0            | 2                                    | 2            | 100%                       |
| I-F3-1     | XY                 | XY     | 68           | 68            | 100%              | 0                                  | 0            | 12                                   | 12           | 100%                       |
| I-F3-2     | XX                 | XY     | 33           | 33            | 100%              | 0                                  | 0            | 10                                   | 8            | 80%                        |
| I-F3-3     | XX                 | XY     | 59           | 59            | 100%              | 0                                  | 0            | 12                                   | 12           | 100%                       |
| I-F3-4     | XX                 | XY     | 40           | 40            | 100%              | 0                                  | 0            | 10                                   | 9            | 90%                        |
| I-F4-1     | XX                 | XY     | 50           | 39            | 78%               | 11                                 | 0            | 15                                   | 12           | 62%                        |
| I-F4-2     | XX                 | XY     | 41           | 24            | 59%               | 17                                 | 0            | 13                                   | 0            | 0%                         |
| I-F4-3     | XX                 | XY     | 32           | 10            | 31%               | 22                                 | 0            | 10                                   | 2            | 6%                         |
| I-F4-4     | XX                 | XY     | 16           | 16            | 100%              | 0                                  | 0            | 10                                   | 9            | 90%                        |
| I-F4-5     | XX                 | XY     | 51           | 51            | 100%              | 0                                  | 0            | 15                                   | 15           | 100%                       |
| I-F4-6     | XY                 | XY     | 42           | 19            | 45%               | 23                                 | 0            | 13                                   | 7            | 24%                        |
| II-F1-1    | XX                 | Y?     | 13           | 13            | 100%              | 0                                  | 0            | 2                                    | 2            | 100%                       |
| II-F2-1    | XY                 | YY     | 60           | 60            | 100%              | 0                                  | 0            | 60                                   | 60           | 100%                       |
| II-F2-2    | XY                 | XY     | 20           | 20            | 100%              | 0                                  | 0            | 1                                    | 1            | 100%                       |
| II-F3-1    | YY                 | XY     | 28           | 0             | 0%                | 28                                 | 0            | 0                                    | 0            | 0%                         |
| II-F3-2    | YY                 | XY     | 42           | 0             | 0%                | 42                                 | 0            | 0                                    | 0            | 0%                         |
| II-F3-3    | YY                 | XY     | 57           | 0             | 0%                | 57                                 | 0            | 0                                    | 0            | 0%                         |

268

269 *Wolbachia* transmission rate from mother to offspring differed significantly between XX, XY  
270 and YY mothers, considering all 20 families (Kruskal-Wallis test,  $\chi^2=8.84$ ,  $p=0.01$ ) or only the 16  
271 families in which *Wolbachia* presence was tested in  $\geq 10$  individuals (Kruskal-Wallis test,  $\chi^2=7.91$ ,  
272  $p=0.02$ ). *Wolbachia* transmission rate was high (generally  $\geq 80\%$ ) and did not differ significantly  
273 between XX and XY mothers (Dunn's post-hoc tests,  $p=0.73$  for 20 families and  $p=0.56$  for 16 families)  
274 (Fig 3). By contrast, *Wolbachia* infected none of the 159 offspring of the 4 YY mothers. This result  
275 cannot be ascribed to *Wolbachia* transmission to offspring and subsequent selective death of  
276 embryos carrying *Wolbachia* infection because progeny size did not differ significantly between XX,  
277 XY and YY mothers (Kruskal-Wallis tests,  $\chi^2=0.18$ ,  $p=0.91$  for 20 families and  $\chi^2= 3.32$ ,  $p=0.19$  for 16  
278 families) (Table 2). Instead, the YY genotype is associated with a lack of *Wolbachia* transmission from  
279 mother to offspring. As a result, *Wolbachia* transmission rate differed significantly between YY  
280 mothers and both XX mothers (Dunn's post-hoc tests:  $p=0.006$  for 20 families and  $p=0.01$  for 16  
281 families) and XY mothers (Dunn's post-hoc tests:  $p=0.008$  for 20 families and  $p=0.01$  for 16 families)  
282 (Fig 3). Consequently, as all offspring inherited a Y chromosome from their YY mother but no  
283 *Wolbachia* endosymbiont, they all developed as males (Table 2). Importantly, YY mothers originated  
284 from the two independent pedigrees we analysed (S2 and S3 Fig ), indicating that the observed  
285 pattern is robust to *A. nasatum* genetic background.

286

287 [Insert Fig 3 here]

288 **Fig 3.** Boxplot of *Wolbachia* transmission rate from mother to offspring (measured as the frequency  
289 of *Wolbachia*-carrying individuals in each progeny) according to mother's sex chromosome genotype.  
290 The analysis is based on 16 progenies (n) for which *Wolbachia* presence was tested in  $\geq 10$  individuals.  
291 Thick lines and boxes depict median and interquartile range, respectively. Whiskers are bounded to  
292 the most extreme data point within 1.5 the interquartile range. Plots marked with the same letter (a,  
293 b) are not statistically different from each other (Kruskal-Wallis test, followed by pairwise  
294 comparison Dunn test).

295

296 As YY females exclusively produce males, only XX and XY females can produce female  
297 offspring in *Wolbachia*-infected lines of *A. nasatum*. Thus, the X chromosome is necessarily  
298 transmitted to at least a subset of each progeny of these *Wolbachia*-infected females. To evaluate  
299 consequences on sex chromosome frequencies in the long term, we extended Taylor's theoretical  
300 work [31] to enable the transmission rate of a cytoplasmic sex ratio distorter to vary depending on

301 female sex chromosome genotype. Specifically, we simulated the equilibrium frequencies of X and Y  
302 chromosomes in a population of a diploid genetic model containing a distorter with transmission  
303 rates of  $\alpha$ ,  $\alpha$  and 0 in XX, XY and YY females (with  $\alpha$  varying from 0 to 1), respectively, to reflect our  
304 empirical results. Under these conditions, equilibrium frequencies are 25% and 75% for the X and Y  
305 chromosomes for  $\alpha < 0.55$  (Fig 4a). In such cases, the distorter is lost from the population at  
306 equilibrium and the population is comprised of XY males and XX females in equal proportions. By  
307 contrast, for higher  $\alpha$  values, equilibrium frequencies of the X and Y chromosomes vary in opposite  
308 directions, to the extent that the Y chromosome becomes more frequent than the X chromosome,  
309 but X equilibrium frequency is always  $\geq 12.5\%$ , whatever  $\alpha$  (Fig 4a). Thus, a consequence of the lack of  
310 transmission of the distorter by YY females is that the X chromosome cannot be lost from the  
311 population. Another consequence evidenced by our simulations is that the equilibrium frequency of  
312 the distorter never exceeds 50%, whatever  $\alpha$  (Fig 4a). Remarkably, a balanced sex ratio is maintained  
313 in the population at equilibrium, despite infected females individually producing progenies highly  
314 biased towards either females (XX and XY mothers) or males (YY mothers) (Fig 4b). This is in sharp  
315 contrast with the highly female-biased sex ratios at equilibrium expected for  $\alpha > 0.5$  when the  
316 distorter is transmitted by all three types of females[31] (Fig 4b).

317

318 [Insert Fig 4 here]

319 **Fig 4.** Evolutionary consequences of a cytoplasmic sex ratio distorter at the population level. (a)  
320 Equilibrium frequencies of X chromosome (pink line), Y chromosome (blue line) and distorter (dashed  
321 line), according to distorter transmission rate in XX and XY females (YY females do not transmit the  
322 distorter). (b) Evolution of the frequencies of females (solid lines) and individuals carrying the  
323 distorter (dashed lines) through time, with a distorter transmission rate of 0.9. Green: YY females do  
324 not transmit the distorter (only XX and XY females do); orange: all females transmit the distorter.

325

## 326 Discussion

327

328 We sequenced the genome of the terrestrial isopod *A. nasatum*. With an  $N_{50}$  of 86 kb, high  
329 completeness (BUSCO=94%) and near absence of unidentified nucleotides (0.01%), our ~1.2 Gb  
330 assembly is among the best assembled of all large-genome crustaceans sequenced to date [30]. Our  
331 results establish that *A. nasatum* X and Y chromosomes are genetically highly similar. The Y-specific

332 region of the genome may be as small as one megabase and it contains very few genes. Even at  
333 nucleotide resolution, sequence divergence and repeat content indicate very limited sex  
334 chromosome differentiation. This result explains why the unusual YY genotype is viable in this  
335 species. The underlying causes of the very high similarity of *A. nasatum* sex chromosomes include  
336 young evolutionary age, ongoing recombination or both. In any event, this high similarity was likely  
337 instrumental to the establishment of feminizing *Wolbachia* infection in the male heterogametic  
338 isopod *A. nasatum*.

339 An important outcome of the infection of *A. nasatum* by feminizing *Wolbachia* is the unusual  
340 production of YY individuals and XY females. This situation challenges the classical model of sex  
341 chromosome evolution by affecting chromosome effective population size ( $N_e$ ) and recombination  
342 patterns. Classically, recombination arrest occurs between the X and Y chromosomes, leading to a  
343 drastic reduction of Y chromosome  $N_e$  to one third of X chromosome  $N_e$  and one fourth of autosome  
344  $N_e$  (because there is one Y chromosome dose for three X chromosome doses and four autosome  
345 doses per mating pair). Lowered  $N_e$  results in enhanced genetic drift and concomitant reduction of  
346 selection efficiency, leading the Y chromosome to accumulate deleterious mutations and degenerate  
347 [13,15,17–19]. However, the existence of YY individuals and XY females implies that the standard  
348 expectation of sex chromosome  $N_e$  does not apply to *A. nasatum* in the presence of *Wolbachia*.  
349 Indeed, our simulations indicate that X chromosome  $N_e$  should stabilize at about one fourth of Y  
350 chromosome  $N_e$  and about one fifth of autosome  $N_e$  at observed *Wolbachia* transmission rates (Fig  
351 4a). Thus, X chromosome  $N_e$ , not Y chromosome  $N_e$ , is predicted to be dramatically reduced in *A.*  
352 *nasatum* genetic backgrounds infected by feminizing *Wolbachia*. Furthermore, the occurrence of YY  
353 individuals opens the possibility of Y-Y recombination and more efficient selection, which may  
354 prevent the accumulation of deleterious mutations on the Y chromosome. By contrast, XX individuals  
355 are rare according to our simulations (<2%), thereby reducing the opportunity of X-X recombination.  
356 This suggests that the X chromosome, rather than the Y chromosome, may accumulate deleterious  
357 mutations and degenerate in the long term. Another possibility to consider is that recombination  
358 patterns may differ between sexes (heterochiasmy) in some species, so that the X and Y  
359 chromosomes may not recombine simply because males do not recombine (whereas females do)  
360 [15]. If so, the existence of XY females in *A. nasatum* as a consequence of *Wolbachia* infection would  
361 open the possibility of X-Y recombination in phenotypic females, as previously reported in frogs [41].  
362 Unfortunately, male and female patterns of recombination are unknown in terrestrial isopods. Their  
363 investigation therefore represents a perspective for future research. In any event, there appears to  
364 be ample scope for microbial symbionts to drive the molecular evolution of their host sex  
365 chromosomes.

366 Remarkably, infected YY females did not transmit *Wolbachia* to any offspring, as confirmed in  
367 two independent pedigrees. An evolutionary consequence is that the YY genotype cannot become  
368 fixed (nor the X chromosome lost) in infected *A. nasatum* lines. Lack of *Wolbachia* transmission by YY  
369 females also raises the question of the underlying mechanism controlling vertical transmission of the  
370 symbionts. In sharp contrast with the YY genotype, the alternative XX and XY genotypes were  
371 associated with similarly high rates of *Wolbachia* transmission in both pedigrees. Thus, the genetic  
372 basis of *Wolbachia* transmission control fits the model of a recessive allele linked to the Y  
373 chromosome (associated with an X-linked dominant allele), in which the homozygous state blocks  
374 *Wolbachia* transmission. It has been shown previously that within-host microbial interactions can  
375 enhance or reduce symbiont vertical transmission [42]. This applies to *Wolbachia*, which vertical  
376 transmission is prevented by *Asaia* bacteria in *Anopheles* mosquitoes [43]. Host nuclear genotype is  
377 also an important factor that can affect symbiont vertical inheritance. For example, *Wolbachia*  
378 maternal transmission is strongly reduced by actin in *Drosophila* [44] and the *wds* gene in *Nasonia*  
379 [45]. Our results show that sex chromosome genotype represents yet another case of host nuclear  
380 control over symbiont transmission. *Wolbachia* symbionts were previously found to prevent sex  
381 chromosome transmission in *Eurema mandarina* butterflies [46]. Here we show that sex  
382 chromosomes can prevent *Wolbachia* transmission in *A. nasatum*, thereby offering a whole new  
383 perspective on the molecular interplay between feminizing symbionts and host sex chromosomes.

384 The mutation causing the suppression of *Wolbachia* transmission in *A. nasatum* may have  
385 existed in the standing pool of sex chromosome variants prior to *Wolbachia* infection, having evolved  
386 either neutrally or under natural selection. Alternatively, the mutation may have evolved as an  
387 adaptation subsequent to *Wolbachia* infection. While infection by feminizing symbionts normally  
388 leads to highly female-biased sex ratios, the ability of infected YY females to impede *Wolbachia*  
389 transmission in *A. nasatum* results in the production of all-male progenies, due to the systematic  
390 inheritance of a maternal Y chromosome. Interestingly, this situation restores balanced sex ratios at  
391 the population level, as indicated by our simulations (Fig 4) and consistent with empirical evidence  
392 [35,47]. This opens the possibility that blocking of *Wolbachia* transmission by YY females may have  
393 evolved to suppress feminization and ensuing sex ratio biases, as predicted by sex ratio selection  
394 [10–12,15]. Indeed, strong sex ratio biases towards females imposed by feminizing symbionts induce  
395 nucleo-cytoplasmic conflicts with most nuclear genes, which are biparentally inherited and optimally  
396 benefit from balanced sex ratios. In principle, conflict resolution may be achieved by restoring  
397 balanced sex ratios at the parental level, through selection of females producing balanced sex ratios  
398 [48]. Alternatively, resolution may occur at the population level, through selection of females  
399 producing male-biased sex ratios to compensate for the female-biased progenies of infected females

400 [48]. YY females in *A. nasatum* may represent an original example of conflict resolution at the  
401 population level. Several cases of nuclear suppression preventing the action or transmission of sex  
402 ratio distorting symbionts have been reported [11], including in the isopod *A. vulgare* [49,50]. A  
403 distinguishing feature of symbiont suppression in *A. nasatum* is its connection with sex  
404 chromosomes.



## 405 **Materials & Methods**

406

### 407 *Genome sequencing and assembly*

408 All *A. nasatum* individuals used for sequencing were from our inbred laboratory line ANa,  
409 which is originally derived from wild animals caught in Thuré, France, in 2008. Specifically, we used  
410 XY genetic males and XX genetic females descended from a single pair of grandparents of the family  
411 ANa2 (according to the crossing scheme shown in Fig S4) to minimize heterozygosity. Total genomic  
412 DNA was extracted using the Qiagen DNeasy Blood and Tissue Kit, according to the protocol for  
413 animal tissues (3 h of incubation in proteinase K at 56°C and 30 min of RNase treatment at 37°C).  
414 Absence of *Wolbachia* endosymbionts in all samples was confirmed by PCR using the *ftsZ* and *wsp*  
415 markers [21,36]. Short paired-end libraries with ~200 bp insert sizes were sequenced with the  
416 Illumina HiSeq2000 technology (S1 Table). In addition, PacBio RS II sequencing (P6C4 chemistry) was  
417 performed to obtain long sequencing reads (S1 Table). Accession numbers for Illumina and PacBio  
418 sequence datasets are provided in S1 Table.

419 Sequencing reads were subjected to quality control and filtering as described previously [30].  
420 Male Illumina and PacBio sequencing reads were used in a hybrid strategy to assemble the male (XY)  
421 genome of *A. nasatum*, as described previously [30]. A summary of the workflow we used (including  
422 assembly, polishing, contaminant removal and scaffolding) is shown in Fig S5. Genome assembly  
423 completeness was evaluated using benchmarking for universal single copy orthologs (BUSCO, version  
424 3.0.1) [37], with the arthropod profile library (-l arthropoda) composed of 1,066 arthropod core  
425 genes. Repeat identification and gene annotation were performed as described previously [30].

426

### 427 *Identification and analyses of contigs containing Y-specific sequences*

428 Contigs containing Y-specific sequences in the *A. nasatum* assembly were identified using the  
429 Chromosome Quotient (CQ) [38] and Y chromosome Genome Scan (YGS) [39], as described  
430 previously [30]. The maximum CQ score was set to 0.35 to retain contigs as Y-specific candidates, as  
431 recommended by CQ authors [38]. The minimum YGS score was set to 35% to retain contigs as Y-  
432 specific candidates. This threshold was selected to account for the high repetitive nature of the *A.*  
433 *nasatum* genome. To identify heterozygous SNPs in the contigs of the male genome assembly, we  
434 applied the Genome Analysis ToolKit (GATK) pipeline (version 3.8-0-ge9d806836) [51], as described  
435 previously [30].

436 PCR assays were designed on the candidate contigs as follows (S4 Table). Primers were  
437 designed with Primer-BLAST [52] in unique regions of the contigs and primer specificity was checked  
438 using Blastn (version 2.2.30+) [53] by aligning primers to the unmasked *A. nasatum* assembly. PCR  
439 reactions were carried out in 25  $\mu$ L with 5  $\mu$ L of buffer 5 $\times$ , 0.5  $\mu$ L of dNTPs (2.15 mM), 0.7  $\mu$ L of each  
440 primer (10  $\mu$ M), 0.25  $\mu$ L of Taq polymerase 5 u/ $\mu$ L, and 1  $\mu$ L of DNA. PCRs were conducted using the  
441 following temperature cycle: 3 min at 94°C for initial denaturation, followed by 35 cycles of 30 s at  
442 94°C, 30 s at 48/50/52°C (depending on primer annealing temperature) and 1 min at 72°C. The final  
443 elongation step was 10 min at 72°C. PCR tests were then conducted in three successive steps: (i) test  
444 on one male and three pools of two females of the ANa2 family (used for genome sequencing); (ii)  
445 test on six males and twelve females from other families of our ANa laboratory line, and (iii) test on  
446 two males and a pool of three females from Beauvoir-sur-Niort population (France) and on two  
447 males and a pool of three females from Piriápolis population (Uruguay). After each step, loci  
448 amplifying in all males and no female were retained for the next step. PCR tests targeting the  
449 autosomal *18S rRNA* [30] and mitochondrial *COI* [54] genes were used as positive controls in all  
450 samples. Absence of *Wolbachia* endosymbionts was also confirmed in all samples by PCR using the  
451 *ftsZ* and *wsp* markers [21,36].

452

#### 453 *Pedigree construction and analyses*

454 We generated two independent *A. nasatum* pedigrees spanning five (pedigree I, S2 Fig) and  
455 four (pedigree II, S3 Fig) generations (*A. nasatum* has a generation time of one year). We started in  
456 2013 with two F0 female founders isolated from a laboratory cage population (NASw) initiated in  
457 2008 from wild animals (caught in Thuré, France) infected by the feminizing *Wolbachia* strain *wNas*  
458 [36]. Each F0 female produced an F1 progeny (resulting from mating with unknown F0 males from  
459 the cage population). Each year, two to six females were selected from the previous generation and  
460 crossed with XY genetic males from our ANa laboratory line (except the father of the II-F2-1 progeny,  
461 which was selected from the NASw cage population and could carry XY or YY sex chromosomes).  
462 Pedigrees I and II were composed of 14 and 6 families, respectively.

463 At each generation, total genomic DNA was extracted from the progenitors (except the F0  
464 male founders and individuals which died prematurely) and from males and females of their  
465 progenies. Presence or absence of *Wolbachia* was tested by PCR using the *ftsZ* and *wsp* markers  
466 [21,36]. We also used two of the previously designed Y-specific markers (contig12740 and  
467 contig18908) to assess the presence of the Y chromosome in the individuals, interpreting PCR results  
468 as follows: amplification indicating the individual is XY or YY and lack of amplification indicating that

469 the individual is XX. PCR tests targeting the autosomal *18S rRNA* [30] and mitochondrial *COI* [54]  
470 genes were used as positive controls in all samples. Based on PCR amplification patterns and  
471 pedigree structures, we were able to infer sex chromosome genotypes (XX, XY or YY) for most  
472 analyzed individuals.

473 To independently assess sex chromosome genotypes (XX, XY or YY), we developed a  
474 quantitative PCR assay measuring Y chromosome abundance relative to autosomes. Y-specific  
475 primers were designed within the Y-specific PCR amplicon previously validated in contig10349  
476 (primer sequences: 5'-CCCTACACAGCATACTTGACAG and 5'-CAGGTGCTCCTTCAGAGAAAC, product  
477 size: 129 bp). Contig10349 abundance was normalized against *EF2* gene abundance [55]. *EF2* is a  
478 single-copy gene in the *A. nasatum* assembly located in autosomal contig8976 (YGS=8.8% and  
479 CQ=1.09). PCR reactions were run in duplicates in a 480 Light-Cycler (Roche) using SYBR Green I  
480 assays, under the following conditions: 10 min at 95°C and 45 cycles of [10 sec at 95°C, 10 sec at  
481 60°C, 20 sec at 72°C]. A melting curve (65°C to 97°C) was recorded at the end of each reaction to  
482 check PCR product uniqueness. Reaction mixture consisted of 0.5 µL of each primer (10 µM), 5 µL of  
483 Fast SYBR-Green Master Mix (Roche) 3 µL of bi-distilled water and 1 µL of extracted DNA.  
484 Fluorescence crossing points ( $C_t$ ) were calculated with the second derivative maximum method using  
485 the LightCycler 1.5 software. PCR amplification efficiency was determined with a calibration curve for  
486 each primer pair. Only PCR reactions producing a single product and with  $C_t \leq 35$  cycles were  
487 considered. Relative abundance of the Y-specific marker relative to autosomal marker was calculated  
488 as  $2^{-\Delta C_t}$ , where  $\Delta C_t = C_{t(Y \text{ chromosome})} - C_{t(\text{autosome})}$ . XX, XY and YY genotypes corresponded to  $2^{-\Delta C_t}$  values of  
489  $\sim 0$ ,  $\sim 0.5$  and  $\sim 1$ , respectively.

490

#### 491 *Simulation of sex chromosome frequencies*

492 To evaluate the evolutionary impact of cytoplasmic sex ratio distorters on sex chromosome  
493 frequencies, we extended Taylor's theoretical work[31] to enable the transmission rate of the  
494 distorter to vary according to female sex chromosome genotypes. Specifically, we simulated the  
495 frequencies of the X chromosome, the Y chromosome, the distorter and females in a population of a  
496 diploid genetic model with a distorter whose transmission rate can vary according to the sex  
497 chromosome genotype of females (i.e. XX, XY and YY). We used the following equations:

#### 498 Genotypes

- 499           ○ Males:  $G_1=XY$  ;  $G_3=YY$  ;  $F_M$ =Males frequency  
500           ○ Females:  $G_2=XX$  ;  $G_4=XX.Wo+$  ;  $G_6=XY.Wo+$  ;  $G_8=YY.Wo+$  ;  $F_F$ =Females frequency

501 Gametes

- 502                   ○ Males:  $P_1=Y$ ;  $P_3=X$   
 503                   ○ Females:  $P_2=X$ ;  $P_4=Y$ ;  $P_6=X.Wo+$ ;  $P_8=Y.Wo+$

504 *Wolbachia* transmission rates by females

- 505                   ○  $t_x$  by  $XX.Wo+$ ;  $t_{XY}$  by  $XY.Wo+$ ;  $t_y$  by  $YY.Wo+$

506 Gametes production formula

- 507                   ○ Male gametes:

508 
$$P_1 = \frac{G_1}{2F_M} + \frac{G_3}{F_M} = \frac{(G_1 + 2G_3)}{2F_M}$$

509 
$$P_3 = \frac{G_1}{F_M}$$

- 510                   ○ Female gametes:

511 
$$P_2 = \frac{G_2}{F_F} + \frac{G_4(1 - t_X)}{F_F} + \frac{G_6(1 - t_{XY})}{2F_F}$$

512 
$$P_4 = \frac{G_6(1 - t_{XY})}{2F_F} + \frac{G_8(1 - t_Y)}{F_F}$$

513 
$$P_6 = \frac{G_4 t_X}{F_F} + \frac{G_6 t_{XY}}{2F_F}$$

514 
$$P_8 = \frac{G_8 t_Y}{F_F} + \frac{G_6 t_{XY}}{2F_F}$$

515 Next generation genotypes production formula

- 516                   ○ Males:

517 
$$G'_1 = (P_1 P_2) + (P_3 P_4)$$

518 
$$G'_3 = (P_1 P_4)$$

- 519                   ○ Females:

520 
$$G'_2 = (P_3 P_2)$$

521 
$$G'_4 = (P_3 P_6)$$

522 
$$G'_6 = (P_1 P_6) + (P_3 P_8)$$

523 
$$G'_8 = (P_1 P_8)$$

524 with  $\sum_{i=1}^8 G'_i = 1$

525 and  $G'_1 = G_1$  ;  $G'_2 = G_2$  ...  $G'_8 = G_8$  at equilibrium.

526 **References**

527

- 528 1. Moran NA. Symbiosis as an adaptive process and source of phenotypic complexity. *Proc Natl*  
529 *Acad Sci USA*. 2007;104: 8627. doi:10.1073/pnas.0611659104
- 530 2. McFall-Ngai M, Hadfield MG, Bosch TCG, Carey HV, Domazet-Lošo T, Douglas AE, et al. Animals  
531 in a bacterial world, a new imperative for the life sciences. *Proc Natl Acad Sci USA*. 2013;110:  
532 3229. doi:10.1073/pnas.1218525110
- 533 3. Bright M, Bulgheresi S. A complex journey: transmission of microbial symbionts. *Nature*  
534 *Reviews Microbiology*. 2010;8: 218.
- 535 4. Funkhouser LJ, Bordenstein SR. Mom Knows Best: The Universality of Maternal Microbial  
536 Transmission. *PLOS Biology*. 2013;11: e1001631. doi:10.1371/journal.pbio.1001631
- 537 5. Baumann P. Biology bacteriocyte-associated endosymbionts of plant sap-sucking insects. *Annu*  
538 *Rev Microbiol*. 2005;59: 155–189. doi:10.1146/annurev.micro.59.030804.121041
- 539 6. Oliver KM, Degan PH, Hunter MS, Moran NA. Bacteriophages encode factors required for  
540 protection in a symbiotic mutualism. *Science (New York, NY)*. 2009;325: 992–994.  
541 doi:10.1126/science.1174463
- 542 7. Hedges LM, Brownlie JC, O'Neill SL, Johnson KN. Wolbachia and Virus Protection in Insects.  
543 *Science*. 2008;322: 702–702. doi:10.1126/science.1162418
- 544 8. Teixeira L, Ferreira Á, Ashburner M. The Bacterial Symbiont Wolbachia Induces Resistance to  
545 RNA Viral Infections in *Drosophila melanogaster*. *PLOS Biology*. 2008;6: e1000002.  
546 doi:10.1371/journal.pbio.1000002
- 547 9. Engelstädter J, Hurst GDD. The Ecology and Evolution of Microbes that Manipulate Host  
548 Reproduction. *Annual Review of Ecology, Evolution, and Systematics*. 2009;40: 127–149.  
549 doi:10.1146/annurev.ecolsys.110308.120206
- 550 10. Cordaux R, Bouchon D, Grève P. The impact of endosymbionts on the evolution of host sex-  
551 determination mechanisms. *Trends Genet*. 2011;27: 332–341. doi:10.1016/j.tig.2011.05.002
- 552 11. Hurst GDD, Frost CL. Reproductive parasitism: maternally inherited symbionts in a biparental  
553 world. *Cold Spring Harbor perspectives in biology*. 2015;7: a017699.  
554 doi:10.1101/cshperspect.a017699
- 555 12. Werren JH, Beukeboom LW. Sex Determination, Sex Ratios, and Genetic Conflict. *Annual*  
556 *Review of Ecology and Systematics*. 1998;29: 233–261. doi:10.1146/annurev.ecolsys.29.1.233
- 557 13. Bachtrog D, Mank JE, Peichel CL, Kirkpatrick M, Otto SP, Ashman T-L, et al. Sex determination:  
558 why so many ways of doing it? *PLoS Biol*. 2014;12: e1001899.  
559 doi:10.1371/journal.pbio.1001899
- 560 14. Mank JE, Hosken DJ, Wedell N. Conflict on the Sex Chromosomes: Cause, Effect, and  
561 Complexity. *Cold Spring Harb Perspect Biol*. 2014;6: a017715.  
562 doi:10.1101/cshperspect.a017715

- 563 15. Beukeboom LW, Perrin N. The Evolution of Sex Determination. Oxford University Press; 2014.
- 564 16. Leclercq S, Thézé J, Chebbi MA, Giraud I, Moumen B, Ernenwein L, et al. Birth of a W sex  
565 chromosome by horizontal transfer of Wolbachia bacterial symbiont genome. PNAS. 2016;  
566 15036–15041. doi:10.1073/pnas.1608979113
- 567 17. Bergero R, Charlesworth D. The evolution of restricted recombination in sex chromosomes.  
568 Trends in Ecology & Evolution. 2009;24: 94–102. doi:10.1016/j.tree.2008.09.010
- 569 18. Ming R, Bendahmane A, Renner SS. Sex Chromosomes in Land Plants. Annu Rev Plant Biol.  
570 2011;62: 485–514. doi:10.1146/annurev-arplant-042110-103914
- 571 19. Bachtrog D. Y-chromosome evolution: emerging insights into processes of Y-chromosome  
572 degeneration. Nat Rev Genet. 2013;14: 113–124. doi:10.1038/nrg3366
- 573 20. Becking T, Giraud I, Raimond M, Moumen B, Chandler C, Cordaux R, et al. Diversity and  
574 evolution of sex determination systems in terrestrial isopods. Scientific Reports. 2017;7: 1084.  
575 doi:10.1038/s41598-017-01195-4
- 576 21. Bouchon D, Rigaud T, Juchault P. Evidence for widespread Wolbachia infection in isopod  
577 crustaceans: molecular identification and host feminization. Proceedings of the Royal Society of  
578 London B: Biological Sciences. 1998;265: 1081–1090. doi:10.1098/rspb.1998.0402
- 579 22. Cordaux R, Pichon S, Hatira HBA, Doublet V, Grève P, Marcadé I, et al. Widespread Wolbachia  
580 infection in terrestrial isopods and other crustaceans. Zookeys. 2012; 123–131.  
581 doi:10.3897/zookeys.176.2284
- 582 23. Werren JH, Baldo L, Clark ME. Wolbachia: master manipulators of invertebrate biology. Nat Rev  
583 Micro. 2008;6: 741–751. doi:10.1038/nrmicro1969
- 584 24. Rigaud T, Juchault P, Mocquard J-P. The evolution of sex determination in isopod crustaceans.  
585 Bioessays. 1997;19: 409–416. doi:10.1002/bies.950190508
- 586 25. Bouchon D, Cordaux R, Grève P. Feminizing Wolbachia and the evolution of sex determination  
587 in isopods. Insect Symbiosis, Volume 3. CRC Press; 2008. pp. 273–294. Available:  
588 <http://www.crcnetbase.com/doi/abs/10.1201/9781420064117.ch12>
- 589 26. Cordaux R, Gilbert C. Evolutionary Significance of Wolbachia-to-Animal Horizontal Gene  
590 Transfer: Female Sex Determination and the f Element in the Isopod *Armadillidium vulgare*.  
591 Genes (Basel). 2017;8. doi:10.3390/genes8070186
- 592 27. Martin G, Juchault P, Legrand JJ. Mise en évidence d'un micro-organisme intracytoplasmique  
593 symbiote de l'oniscoïde *Armadillidium vulgare* Latr. dont la présence accompagne  
594 l'intersexualité ou la féminisation totale des mâles génétiques de la lignée thelygène. C R Acad  
595 Sci Paris. 1973;276: 2213–2216.
- 596 28. Cordaux R, Michel-Salzat A, Frelon-Raimond M, Rigaud T, Bouchon D. Evidence for a new  
597 feminizing Wolbachia strain in the isopod *Armadillidium vulgare*: evolutionary implications.  
598 Heredity. 2004;93: 78–84. doi:10.1038/sj.hdy.6800482
- 599 29. Juchault P, Legrand J-J. Croisements de néo-mâles expérimentaux chez *Armadillidium vulgare*  
600 Latr. (Crustacé Isopode Oniscoïde). Mise en évidence d'une hétérogamétie femelle. C R Acad Sc  
601 Paris. 1972;1387–1389: 274–276.

- 602 30. Chebbi MA, Becking T, Moumen B, Giraud I, Gilbert C, Peccoud J, et al. The genome of  
603 *Armadillidium vulgare* (Crustacea, Isopoda) provides insights into sex chromosome evolution in  
604 the context of cytoplasmic sex determination. *Molecular Biology and Evolution*. 2019; msz010.  
605 doi:10.1093/molbev/msz010
- 606 31. Taylor DR. Evolutionary consequences of cytoplasmic sex ratio distorters. *Evol Ecol*. 1990;4:  
607 235–248. doi:10.1007/BF02214332
- 608 32. Ferdy J-B, Liu N, Sicard M. Transmission modes and the evolution of feminizing symbionts. *J*  
609 *Evol Biol*. 2016;29: 2395–2409. doi:10.1111/jeb.12963
- 610 33. Juchault P, Legrand J-J, Mocquard J-P. Contribution à l'étude qualitative et quantitative des  
611 facteurs contrôlant le sexe dans les populations du Crustacé Isopode terrestre *Armadillidium*  
612 *vulgare* Latr. I. La population de Niort (Deux-Sèvres). *Arch Zool Exp Gén*. 1980;121: 3–27.
- 613 34. Juchault P, Rigaud T, Mocquard JP. Evolution of sex determination and sex ratio variability in  
614 wild populations of *Armadillidium vulgare* (Latr.)(Crustacea, Isopoda): a case study in conflict  
615 resolution. *Acta Oecologica*. 1993;14: 547–562.
- 616 35. Juchault P, Legrand J-J. Analyse génétique et physiologique de la détermination du sexe dans  
617 une population du Crustacé Isopode Oniscoïde *Armadillidium nasatum*. *Arch Zool exp gén*.  
618 1979;120: 25–43.
- 619 36. Cordaux R, Michel-Salzat A, Bouchon D. Wolbachia infection in crustaceans: novel hosts and  
620 potential routes for horizontal transmission. *Journal of Evolutionary Biology*. 2001;14: 237–243.  
621 doi:10.1046/j.1420-9101.2001.00279.x
- 622 37. Simão FA, Waterhouse RM, Ioannidis P, Kriventseva EV, Zdobnov EM. BUSCO: assessing  
623 genome assembly and annotation completeness with single-copy orthologs. *Bioinformatics*.  
624 2015;31: 3210–3212. doi:10.1093/bioinformatics/btv351
- 625 38. Hall AB, Qi Y, Timoshevskiy V, Sharakhova MV, Sharakhov IV, Tu Z. Six novel Y chromosome  
626 genes in *Anopheles* mosquitoes discovered by independently sequencing males and females.  
627 *BMC Genomics*. 2013;14: 273. doi:10.1186/1471-2164-14-273
- 628 39. Carvalho AB, Clark AG. Efficient identification of Y chromosome sequences in the human and  
629 *Drosophila* genomes. *Genome Res*. 2013;23: 1894–1907. doi:10.1101/gr.156034.113
- 630 40. Charlesworth D, Charlesworth B, Marais G. Steps in the evolution of heteromorphic sex  
631 chromosomes. *Heredity (Edinb)*. 2005;95: 118–128. doi:10.1038/sj.hdy.6800697
- 632 41. Rodrigues N, Studer T, Dufresnes C, Perrin N. Sex-Chromosome Recombination in Common  
633 Frogs Brings Water to the Fountain-of-Youth. *Mol Biol Evol*. 2018;35: 942–948.  
634 doi:10.1093/molbev/msy008
- 635 42. Rock DI, Smith AH, Joffe J, Albertus A, Wong N, O'Connor M, et al. Context-dependent vertical  
636 transmission shapes strong endosymbiont community structure in the pea aphid,  
637 *Acyrtosiphon pisum*. *Mol Ecol*. 2018;27: 2039–2056. doi:10.1111/mec.14449
- 638 43. Hughes GL, Dodson BL, Johnson RM, Murdock CC, Tsujimoto H, Suzuki Y, et al. Native  
639 microbiome impedes vertical transmission of *Wolbachia* in *Anopheles* mosquitoes. *Proc Natl*  
640 *Acad Sci USA*. 2014;111: 12498–12503. doi:10.1073/pnas.1408888111

- 641 44. Newton ILG, Savytskyy O, Sheehan KB. Wolbachia utilize host actin for efficient maternal  
642 transmission in *Drosophila melanogaster*. *PLoS Pathog.* 2015;11: e1004798.  
643 doi:10.1371/journal.ppat.1004798
- 644 45. Funkhouser-Jones LJ, van Opstal EJ, Sharma A, Bordenstein SR. The Maternal Effect Gene *Wds*  
645 Controls Wolbachia Titer in *Nasonia*. *Curr Biol.* 2018;28: 1692-1702.e6.  
646 doi:10.1016/j.cub.2018.04.010
- 647 46. Kageyama D, Ohno M, Sasaki T, Yoshido A, Konagaya T, Jouraku A, et al. Feminizing Wolbachia  
648 endosymbiont disrupts maternal sex chromosome inheritance in a butterfly species. *Evol Lett.*  
649 2017;1: 232–244. doi:10.1002/evl3.28
- 650 47. Juchault P, Legrand JJ. Sex determination and monogeny in terrestrial isopods *Armadillidium*  
651 *vulgare* (Latreille, 1804) and *Armadillidium nasatum* Budde-Lund, 1885. *Monografia Monitore*  
652 *zoologico italiano.* 1989;4: 359–375.
- 653 48. Werren JH. The coevolution of autosomal and cytoplasmic sex ratio factors. *Journal of*  
654 *Theoretical Biology.* 1987;124: 317–334. doi:10.1016/S0022-5193(87)80119-4
- 655 49. Rigaud T, Juchault P. Genetic control of the vertical transmission of a cytoplasmic sex factor in  
656 *Armadillidium vulgare* Latr.(Crustacea, Oniscidea). *Heredity.* 1992;68: 47–52.
- 657 50. Caubet Y, Hatcher MJ, Mocquard JP, Rigaud T. Genetic conflict and changes in heterogametic  
658 mechanisms of sex determination. *Journal of Evolutionary Biology.* 2000;13: 766–777.  
659 doi:10.1046/j.1420-9101.2000.00225.x
- 660 51. Van der Auwera GA, Carneiro MO, Hartl C, Poplin R, del Angel G, Levy-Moonshine A, et al. From  
661 FastQ Data to High-Confidence Variant Calls: The Genome Analysis Toolkit Best Practices  
662 Pipeline: The Genome Analysis Toolkit Best Practices Pipeline. In: Bateman A, Pearson WR,  
663 Stein LD, Stormo GD, Yates JR, editors. *Current Protocols in Bioinformatics.* Hoboken, NJ, USA:  
664 John Wiley & Sons, Inc.; 2013. pp. 11.10.1-11.10.33. doi:10.1002/0471250953.bi1110s43
- 665 52. Ye J, Coulouris G, Zaretskaya I, Cutcutache I, Rozen S, Madden TL. Primer-BLAST: A tool to  
666 design target-specific primers for polymerase chain reaction. *BMC Bioinformatics.* 2012;13:  
667 134. doi:10.1186/1471-2105-13-134
- 668 53. Camacho C, Coulouris G, Avagyan V, Ma N, Papadopoulos J, Bealer K, et al. BLAST+: architecture  
669 and applications. *BMC Bioinformatics.* 2009;10: 421. doi:10.1186/1471-2105-10-421
- 670 54. Folmer O, Black M, Hoeh W, Lutz R, Vrijenhoek R. DNA primers for amplification of  
671 mitochondrial cytochrome c oxidase subunit I from diverse metazoan invertebrates. *Mol*  
672 *Marine Biol Biotechnol.* 1994;3: 294–299.
- 673 55. Chevalier F, Herbinière-Gaboreau J, Charif D, Mitta G, Gavory F, Wincker P, et al. Feminizing  
674 Wolbachia: a transcriptomics approach with insights on the immune response genes in  
675 *Armadillidium vulgare*. *BMC Microbiology.* 2012;12: S1. doi:10.1186/1471-2180-12-S1-S1
- 676
- 677



678 **Legends to supporting information**

679

680 **Fig. S1.** Characterization of sex chromosome genotypes (XX, XY or YY) of *A. nasatum*  
681 individuals based on a quantitative PCR assay. Y chromosome to autosome ratios were  
682 calculated for 60 individuals and compared to expected ratios: 1 for YY individuals  
683 (corresponding to 18 males and 3 females), 0.5 for XX individuals (28 males and 5 females)  
684 and 0 for XX individuals (6 females). Thick lines and boxes depict median and interquartile  
685 range, respectively. Whiskers are bounded to the most extreme data point within 1.5 the  
686 interquartile range.

687 **Fig. S2.** *Armadillidium nasatum* pedigree I used to track inheritance of the Y chromosome  
688 and *Wolbachia*. The pedigree spans five generations (F0-F4) and is comprised of 572  
689 individuals (119 males and 453 females), 269 of which were included in molecular analyses  
690 (individuals not included in the molecular analyses are shown in dotted circles). Males are  
691 shown as squares and females as circles. Individuals carrying *Wolbachia* are shown in purple.  
692 Progeny IDs are shown in grey. Sex chromosome genotype of individuals marked with an  
693 orange star was also assessed with a quantitative PCR assay.

694 **Fig. S3.** *Armadillidium nasatum* pedigree II used to track inheritance of the Y chromosome  
695 and *Wolbachia*. The pedigree spans four generations (F0-F3) and is comprised of 226  
696 individuals (132 males and 94 females), 196 of which were included in molecular analyses  
697 (individuals not included in the molecular analyses are shown in dotted circles). Males are  
698 shown as squares and females as circles. Individuals carrying *Wolbachia* are shown in purple.  
699 Progeny IDs are shown in grey. Sex chromosome genotype of individuals marked with an  
700 orange star was also assessed with a quantitative PCR assay.

701 **Fig. S4.** Workflow of the hybrid strategy used for assembling the *Armadillidium nasatum*  
702 genome.

703 **Table S1.** Characteristics of *Armadillidium nasatum* sequencing datasets generated in this  
704 study.

705 **Table S2.** Annotation statistics of the *Armadillidium nasatum* genome assembly.

706 **Table S3.** Repeat content of the *Armadillidium nasatum* genome.

707 **Table S4.** Characteristics of the 78 contigs of the *Armadillidium nasatum* assembly  
708 considered as Y-specific candidates.

709 **Table S5.** PCR results for Y chromosome and *Wolbachia* analyses of 72 *Armadillidium*  
710 *nasatum* individuals. nt: not tested because male individual originating from *Wolbachia*-free

711 line, hence necessarily XY (except II-F1-1 father from *Wolbachia*-infected line, hence XY or  
712 YY). Y chromosome to autosome ratio was calculated as  $2^{-\Delta Ct}$ .

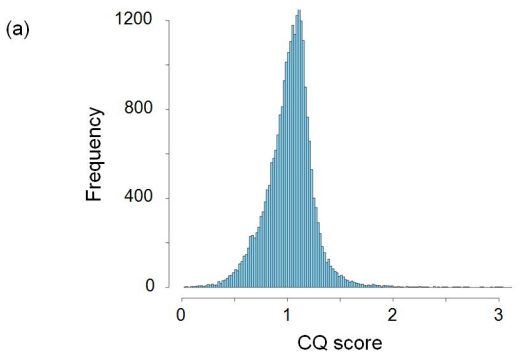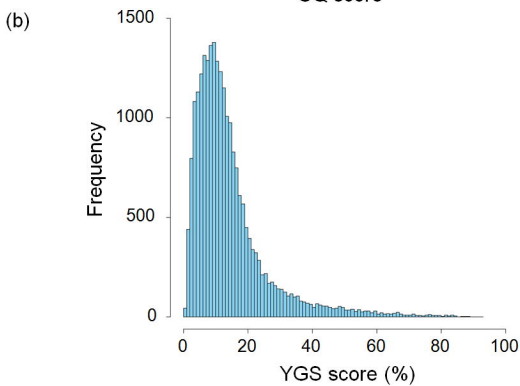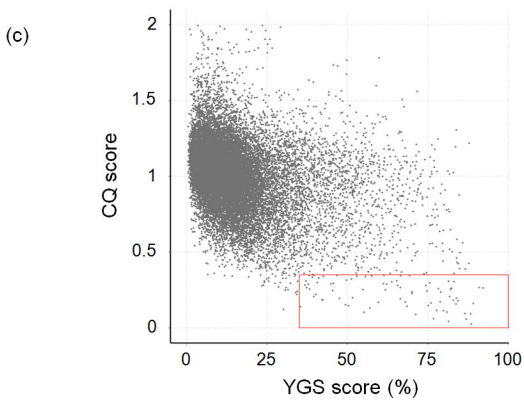

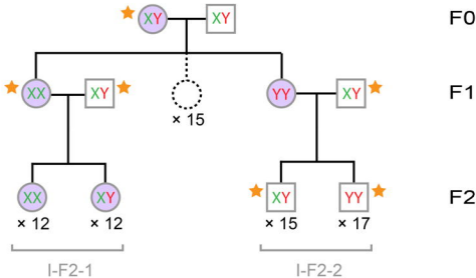

*Wolbachia* transmission rate to offspring

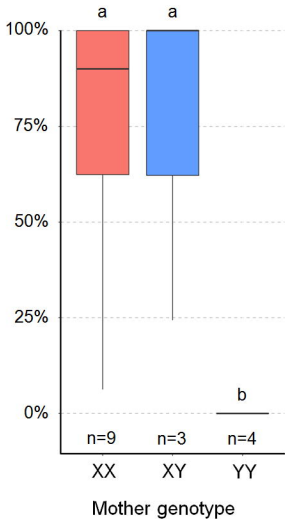

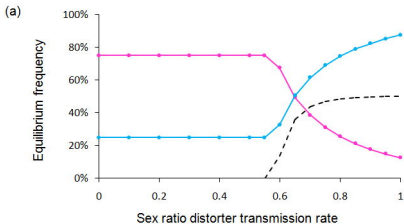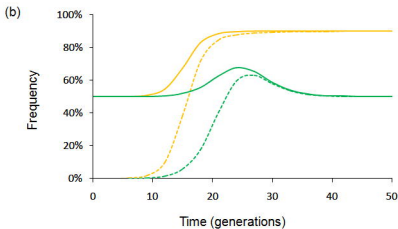

Source: https://www.biorxiv.org/content/10.1101/747444v1.full.pdf
